# Supplementary material for: Nerve agent simulant diethyl chlorophosphate detection using a cyclization reaction approach with high stokes shift system
Source: Royal Society of Chemistry journal article supplement (doi:10.1039/c6nj03712g), 2017-01-01
Supplement: c6nj03712g1.pdf [file c6nj03712g1.pdf]

## SUPPORTING INFORMATION

### **Nerve Agent Simulant Diethyl Chlorophosphate Detection Using Cyclization Reaction Approach with High Stokes Shift System**

Yoon Jeong Jang<sup>a,c#</sup>, Sandip V. Mulay<sup>a,b#</sup>, Youngsam Kim<sup>a,b</sup> Perman Jorayev<sup>a</sup> and David G.  
Churchill<sup>a,b\*</sup>

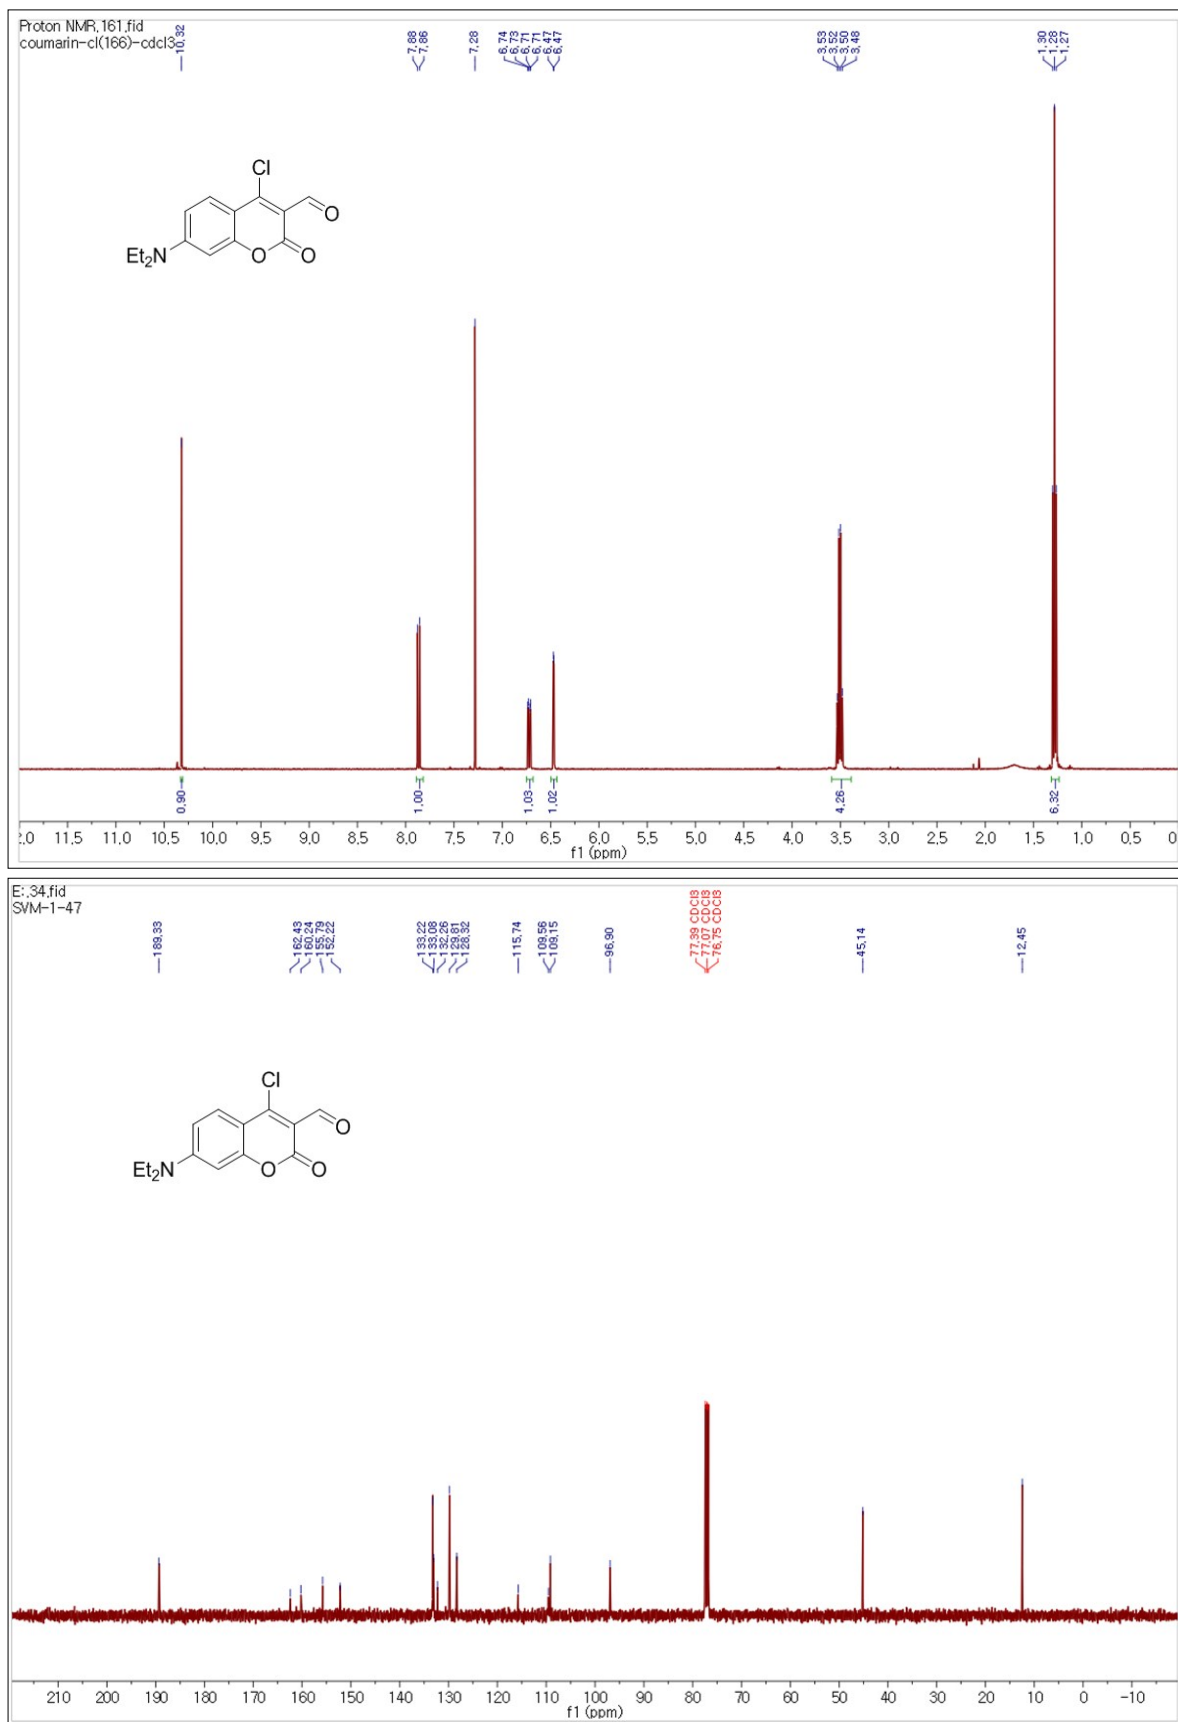

**Fig. S1.** (*top*)  $^1\text{H}$  and (*bottom*)  $^{13}\text{C}$  NMR spectrum of compound **1**.

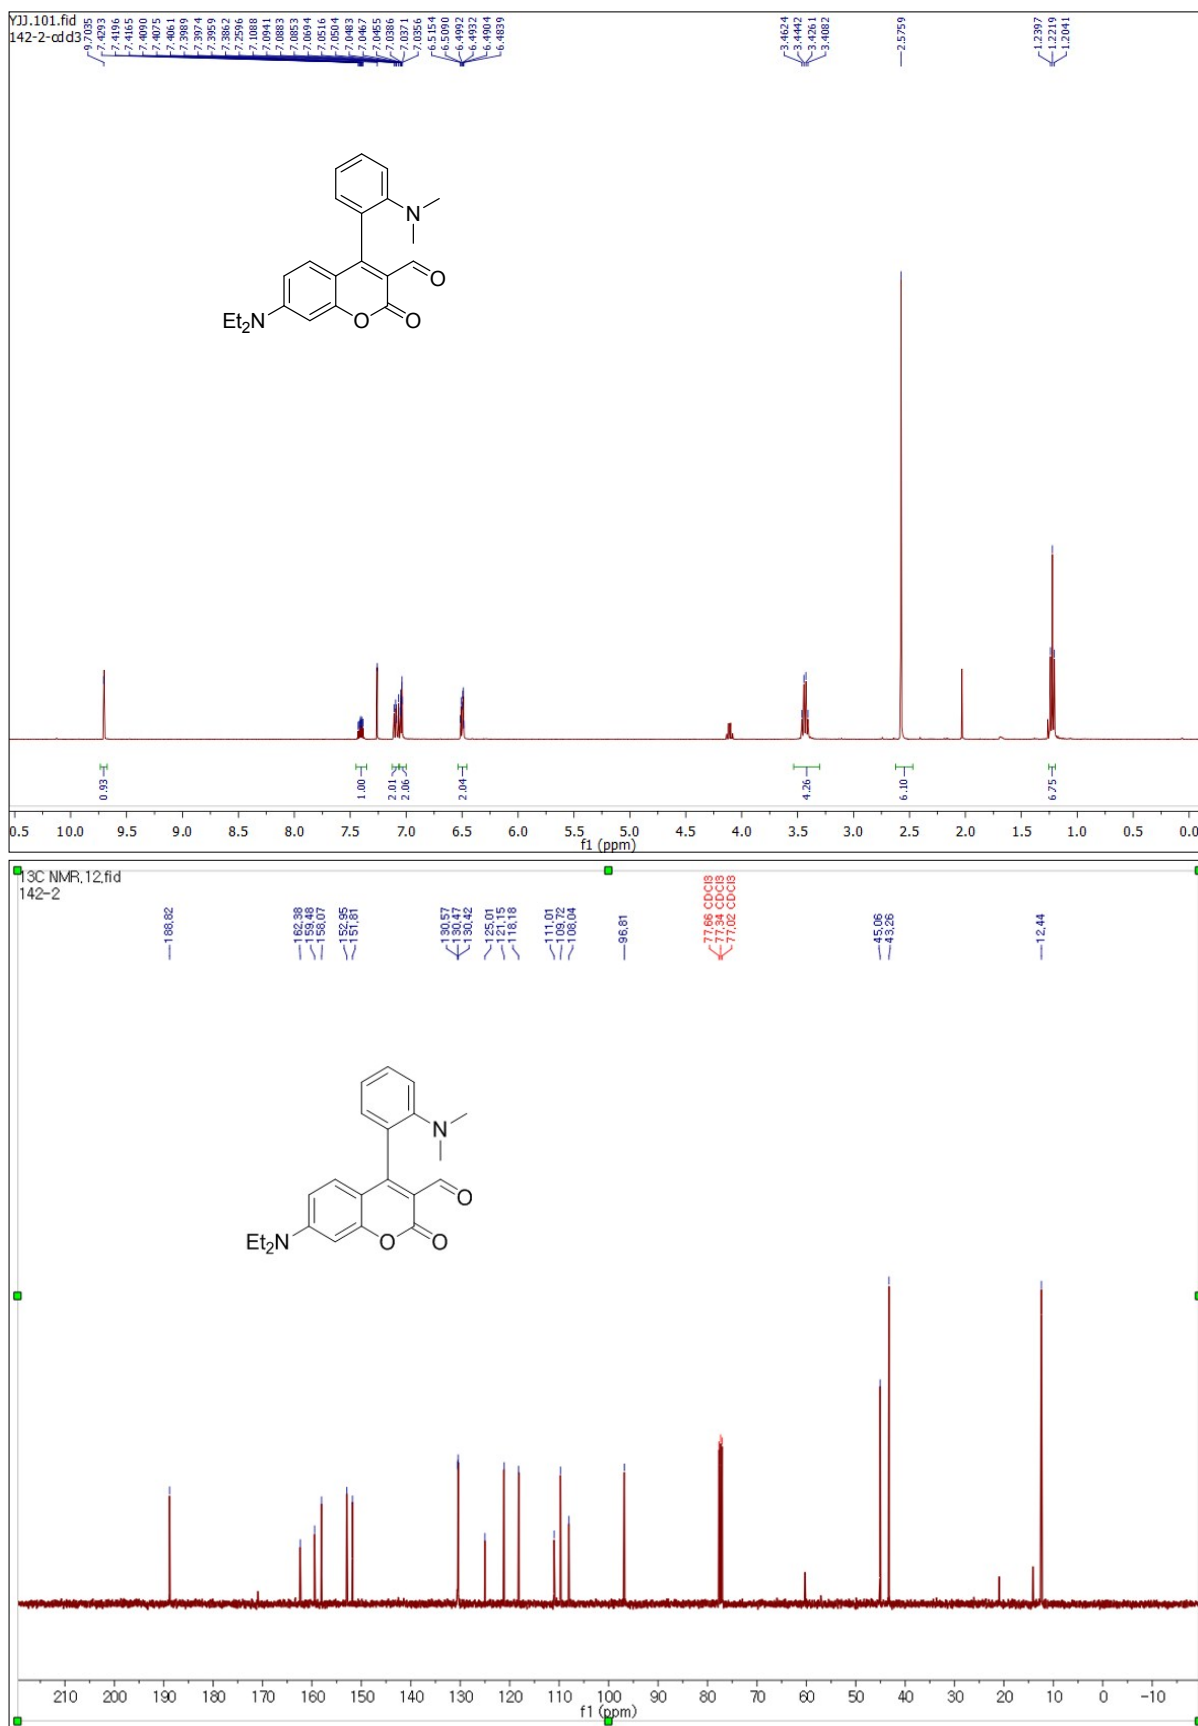

Fig. S2. (top) <sup>1</sup>H and (bottom) <sup>13</sup>C NMR spectrum of compound 2.

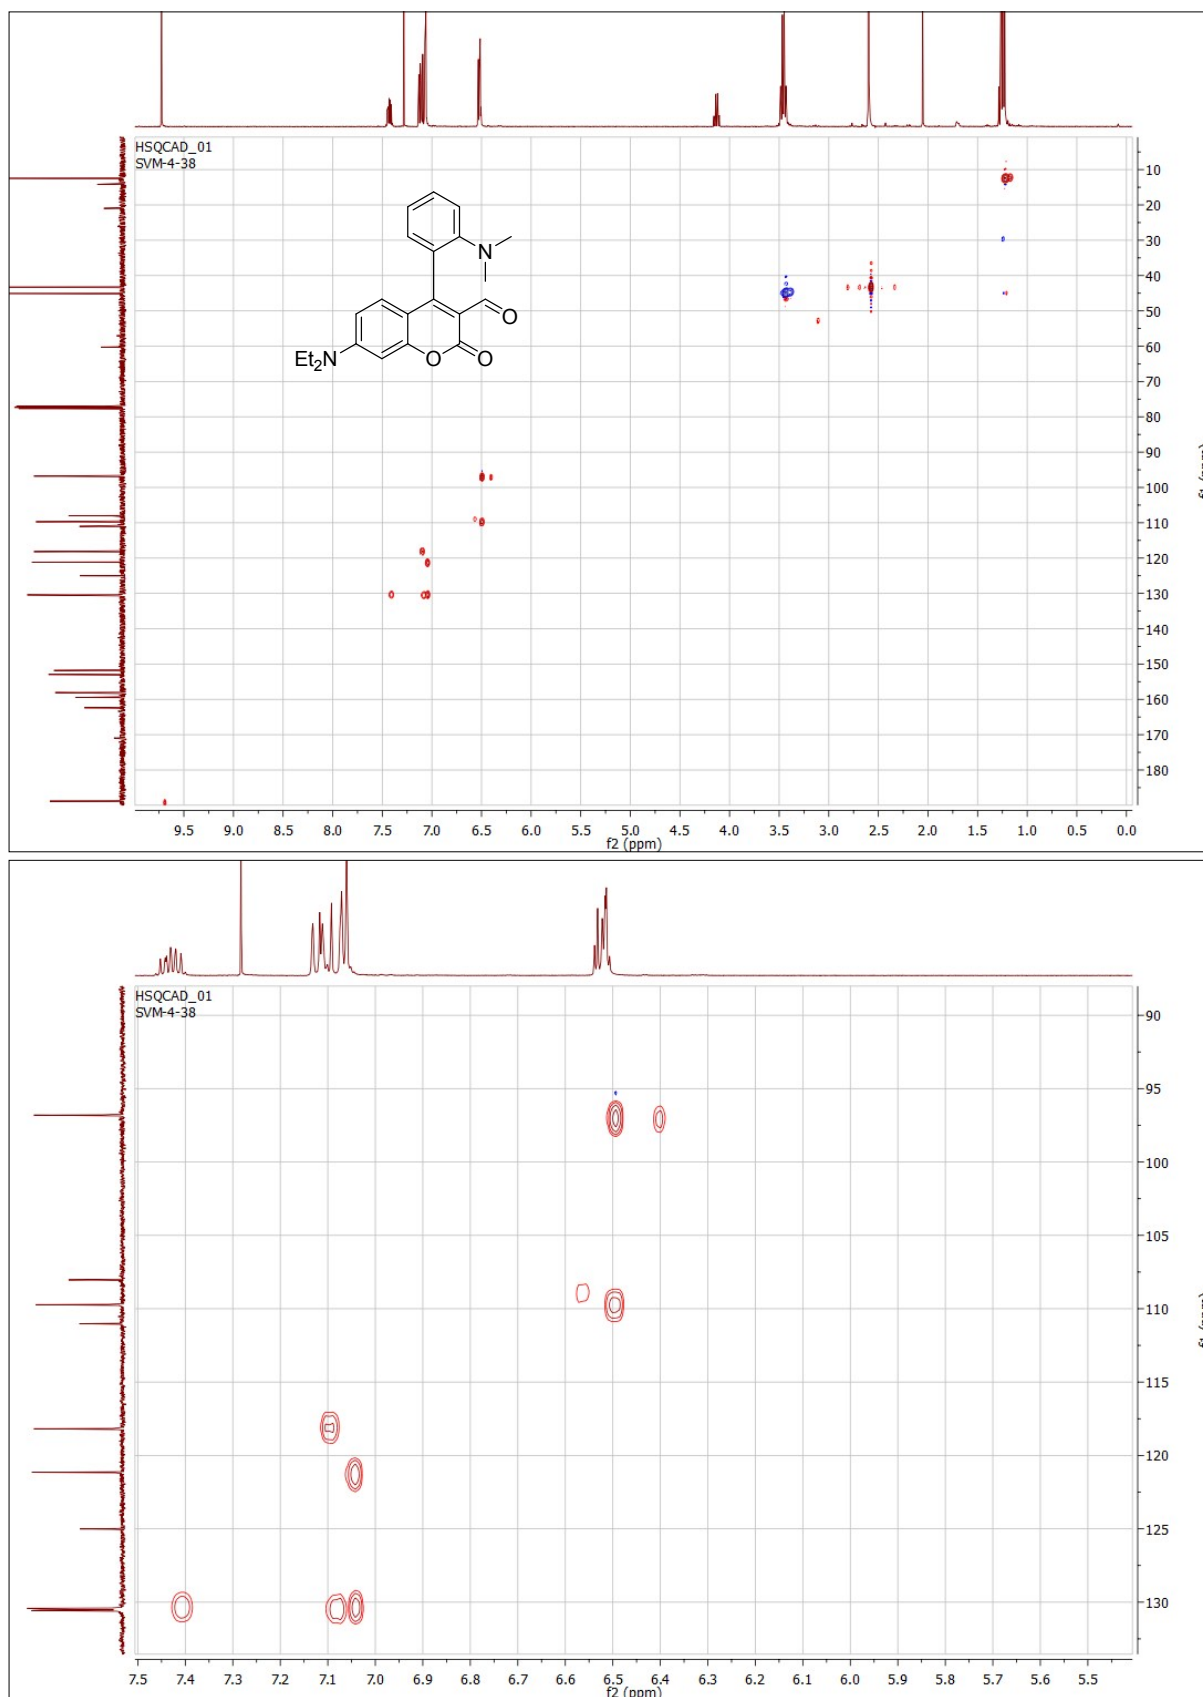

**Fig. S3.** (top)  $^1\text{H}$ - $^{13}\text{C}$  HSQC NMR spectrum of compound **2** and (bottom) expanded aromatic region.

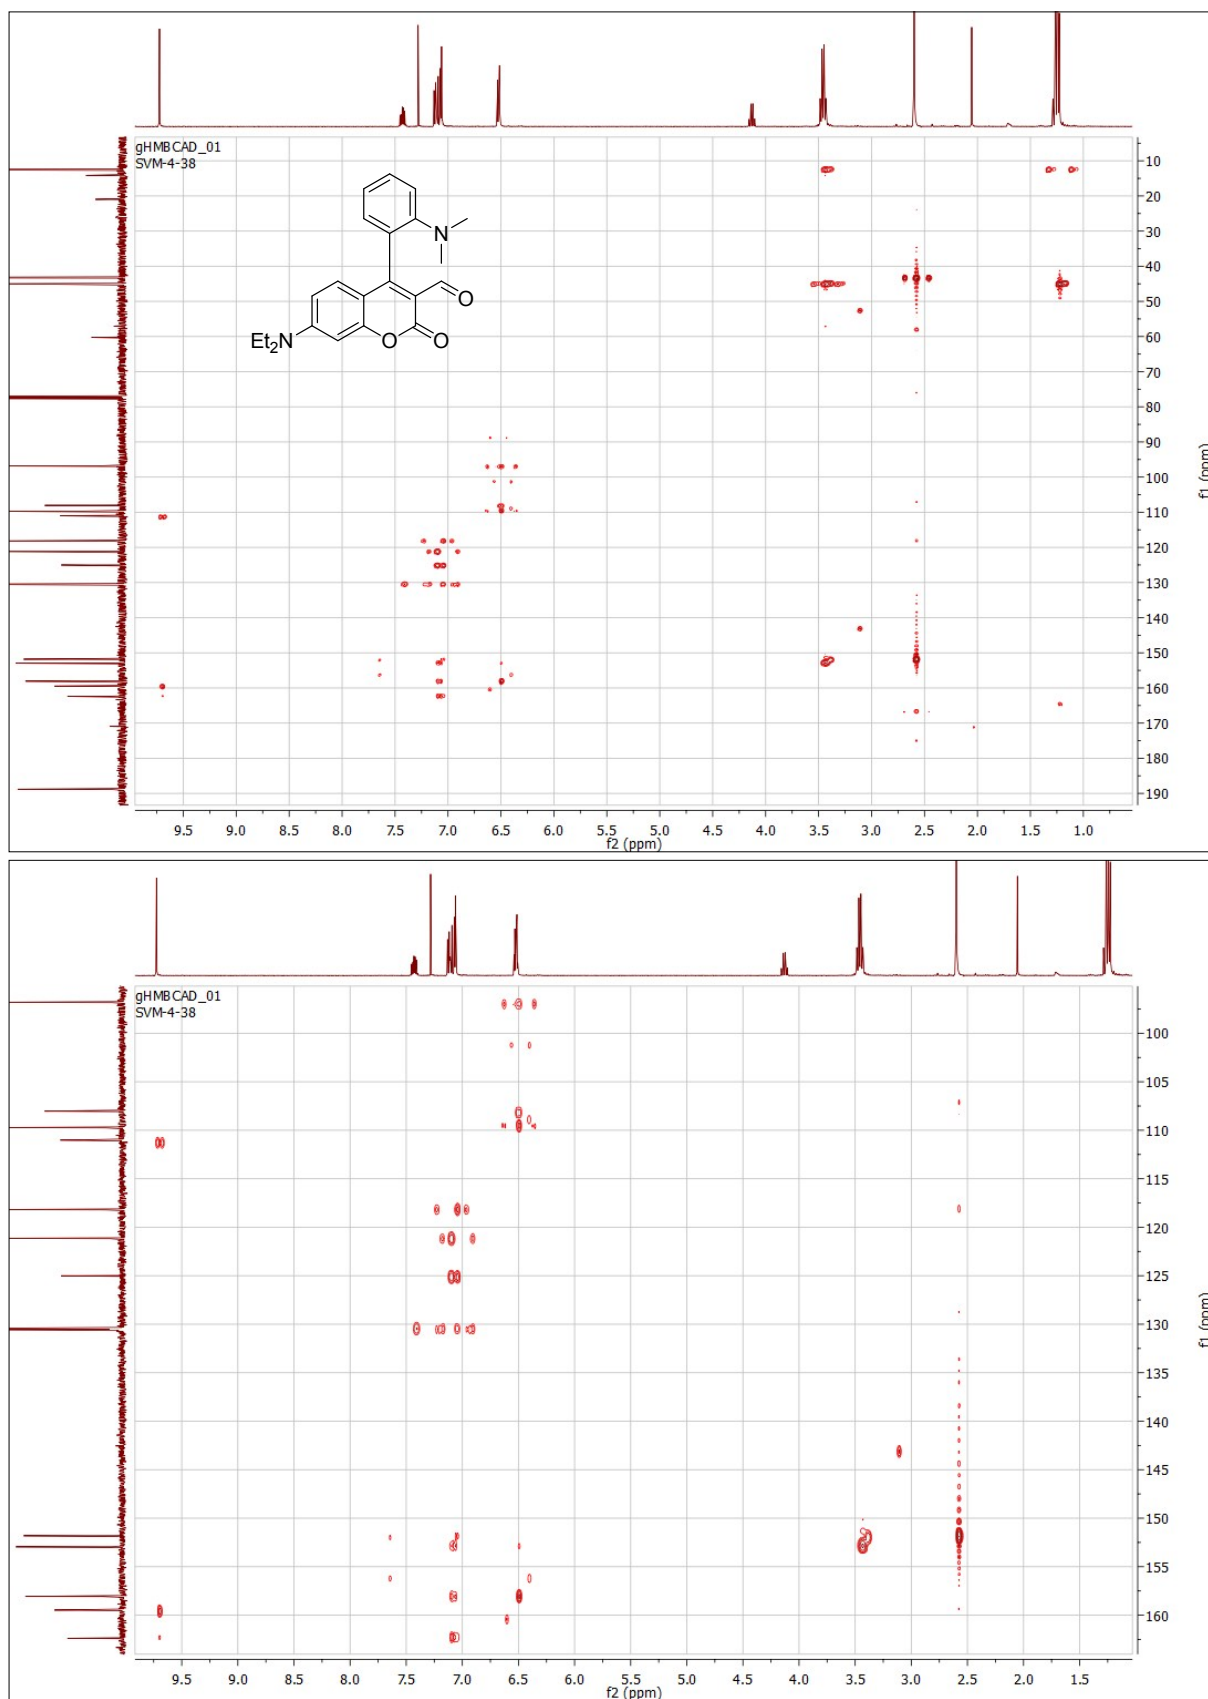

**Fig. S4.** (*top*)  $^1\text{H}$ - $^{13}\text{C}$  HMBC NMR spectrum of compound **2** and (*bottom*) expanded aromatic region.

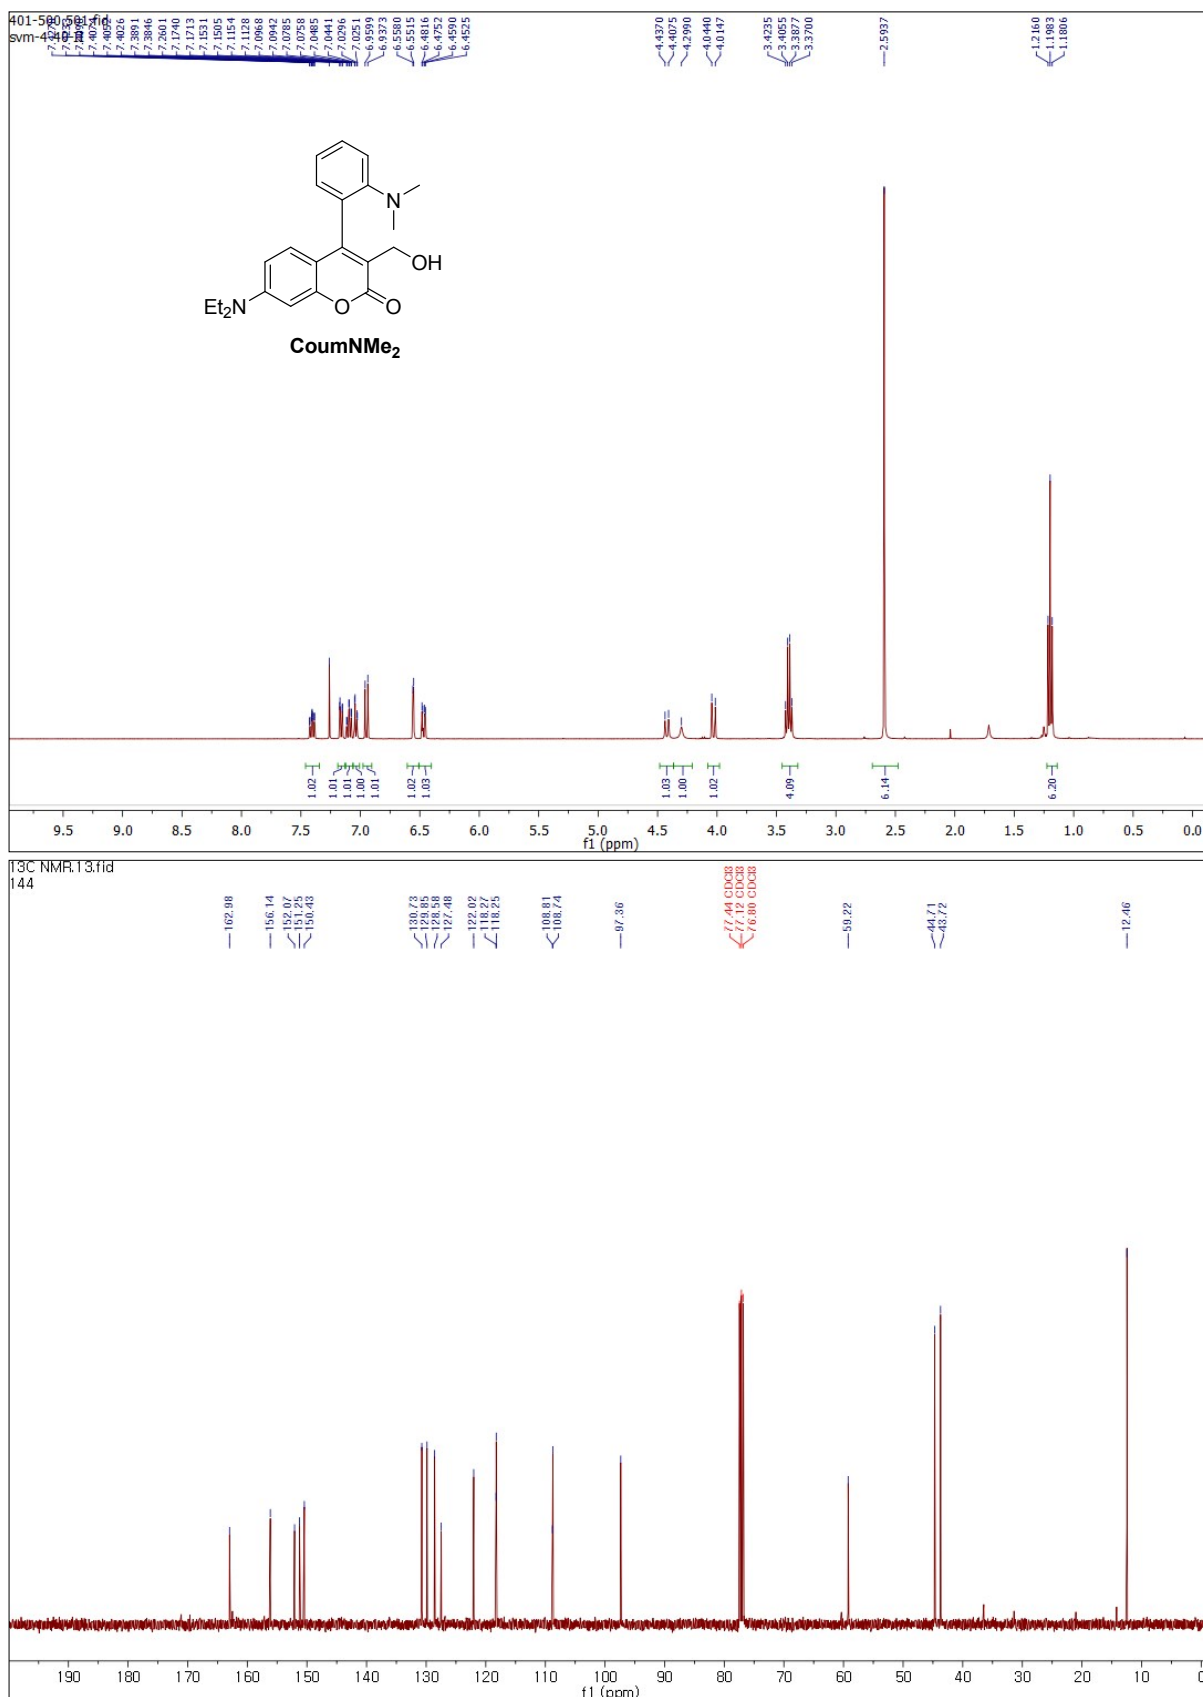

**Fig. S5.** (top) <sup>1</sup>H and (bottom) <sup>13</sup>C NMR spectrum of CoumNMe<sub>2</sub>.

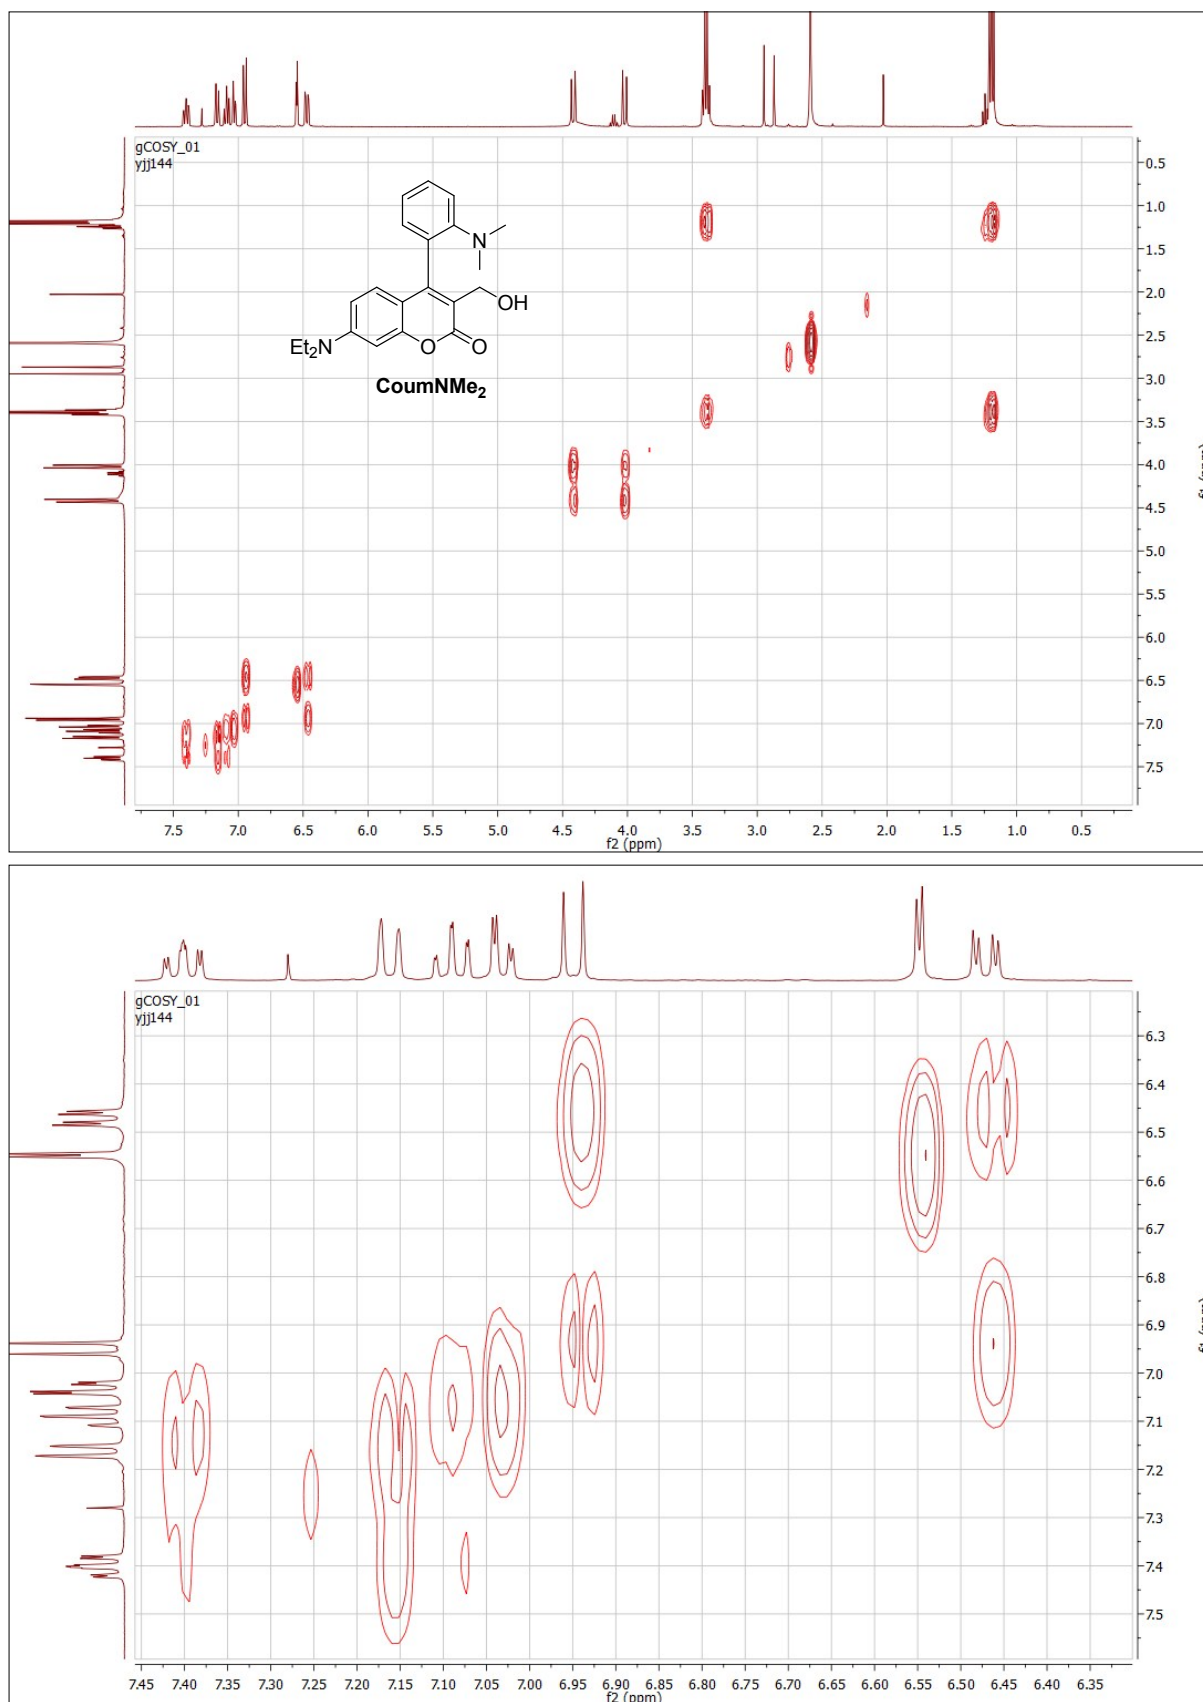

**Fig. S6.** (top) COSY NMR spectrum of CoumNMe<sub>2</sub> and (bottom) expanded aromatic region.

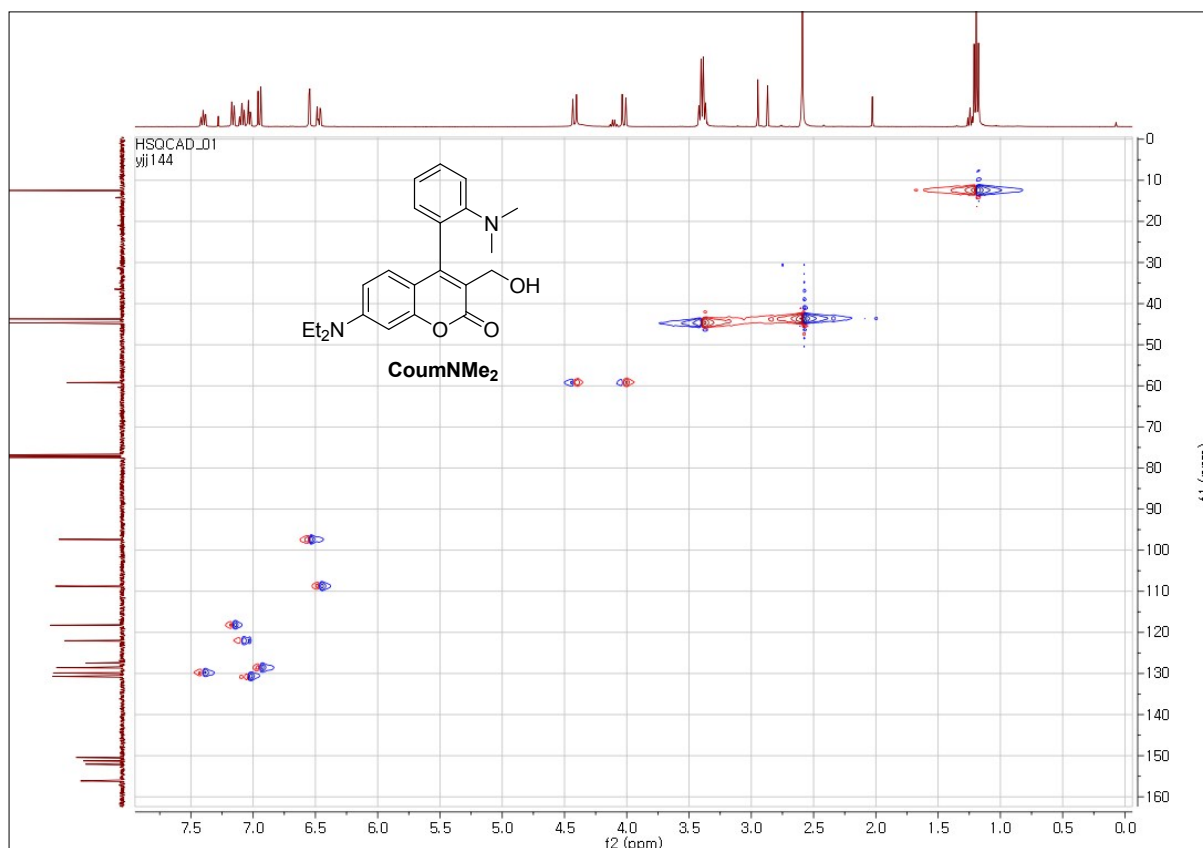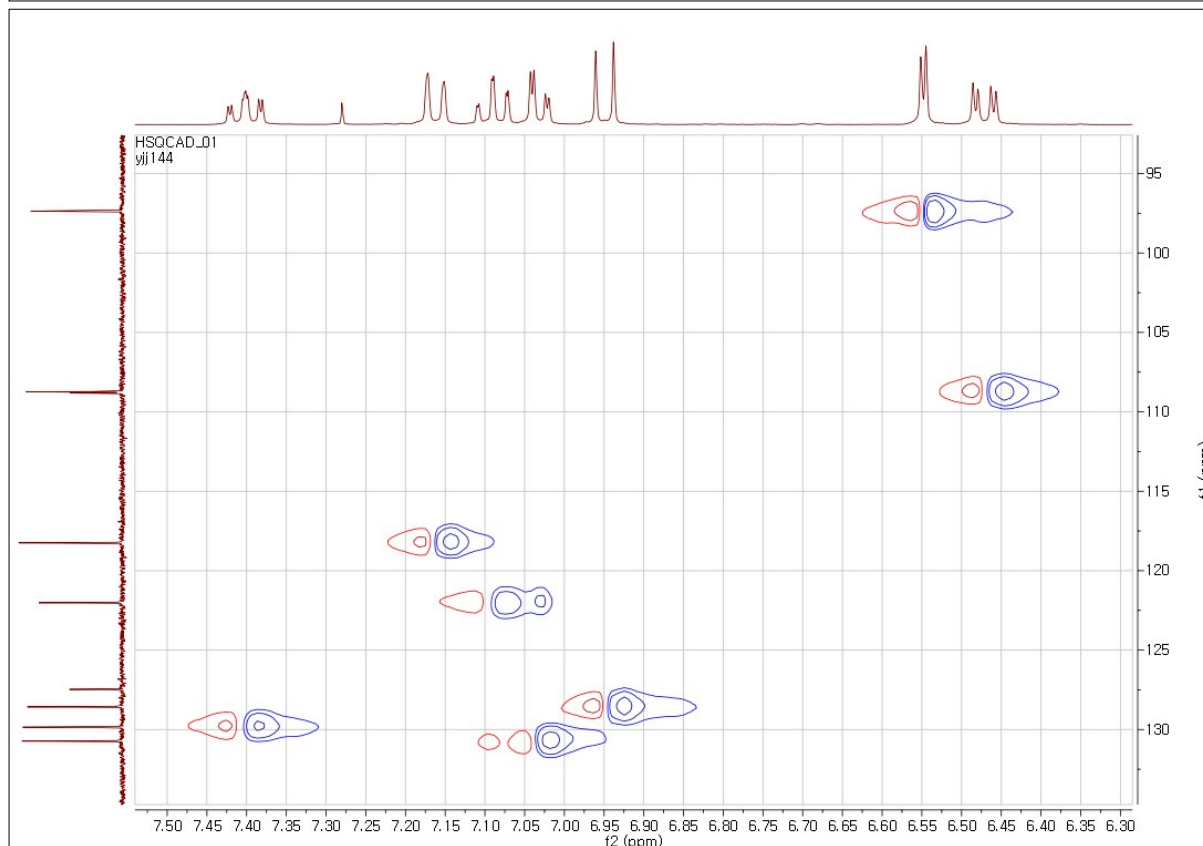

**Fig. S7.** (top)  $^1\text{H}$ - $^{13}\text{C}$  HSQC NMR spectrum of **CoumNMe<sub>2</sub>** and (bottom) expanded aromatic region.



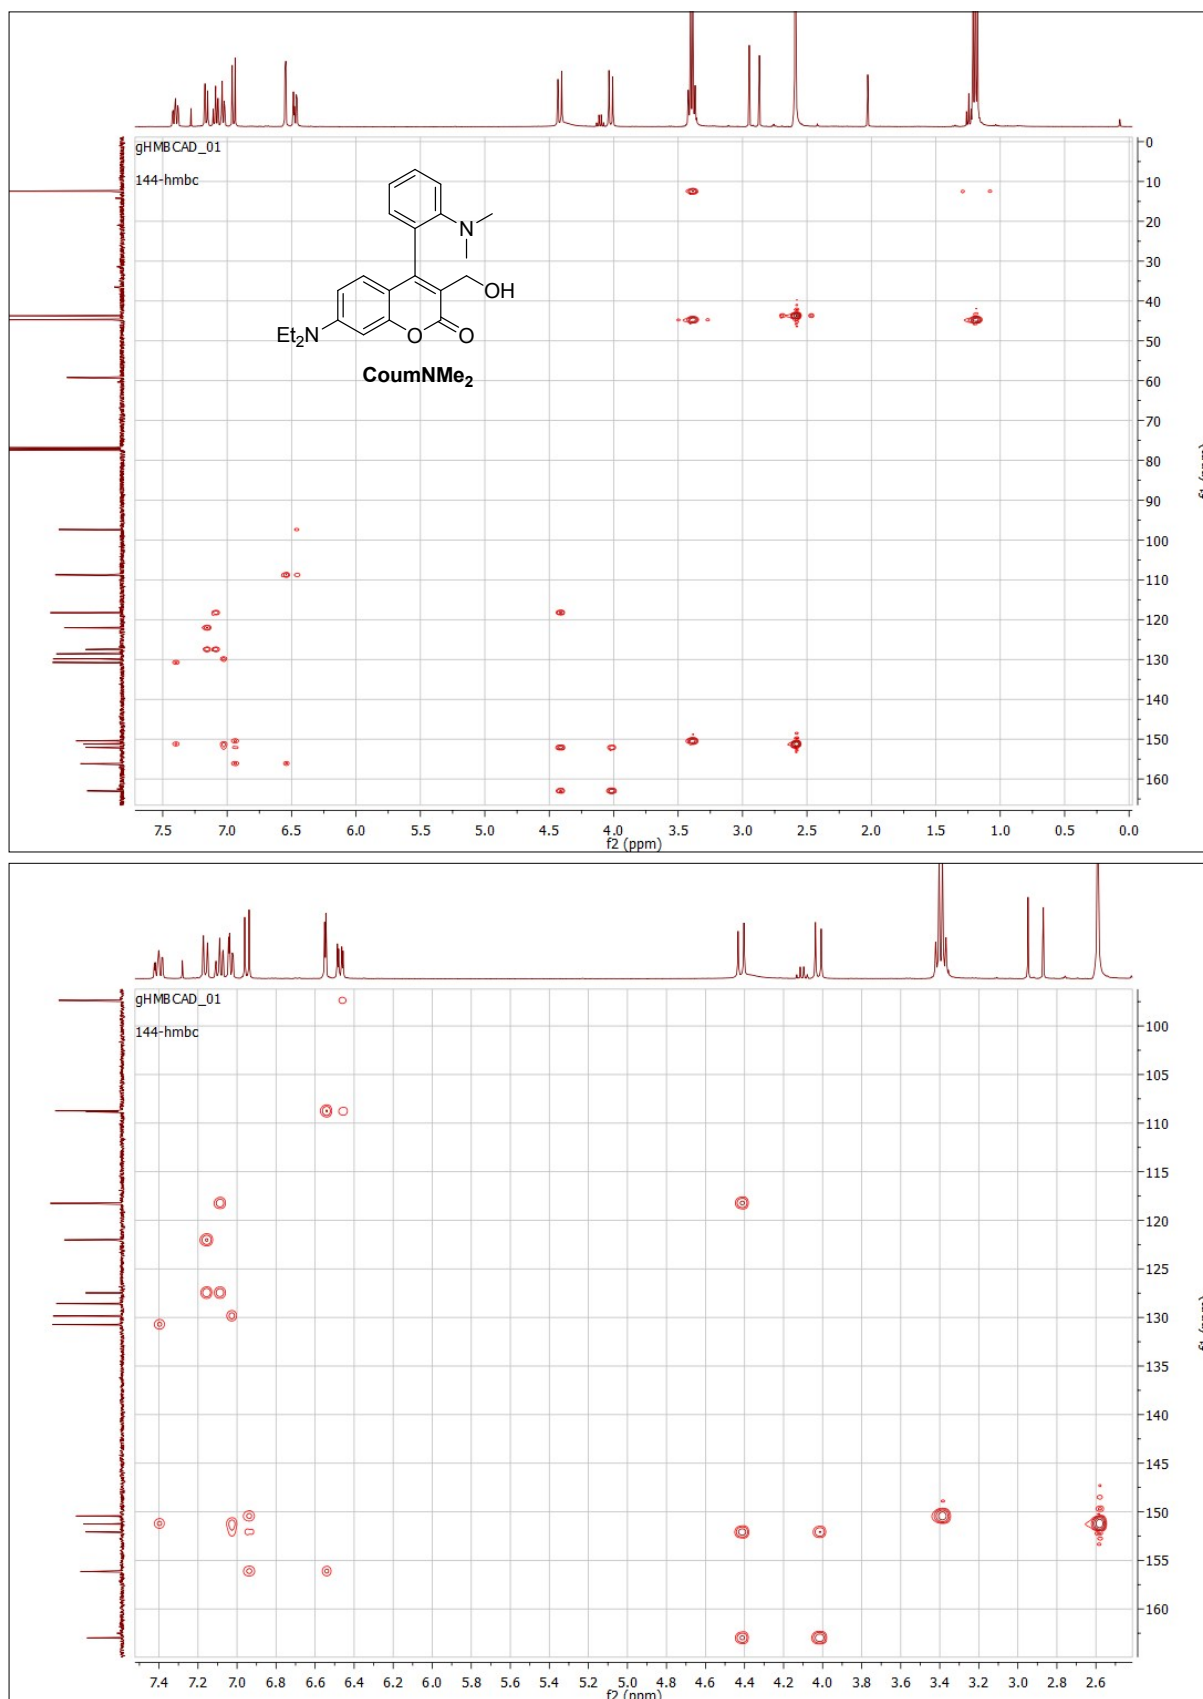

**Fig. S8.** (top)  $^1\text{H}$ - $^{13}\text{C}$  HMBC NMR spectrum of **CoumNMe<sub>2</sub>** and (bottom) expanded aromatic region.

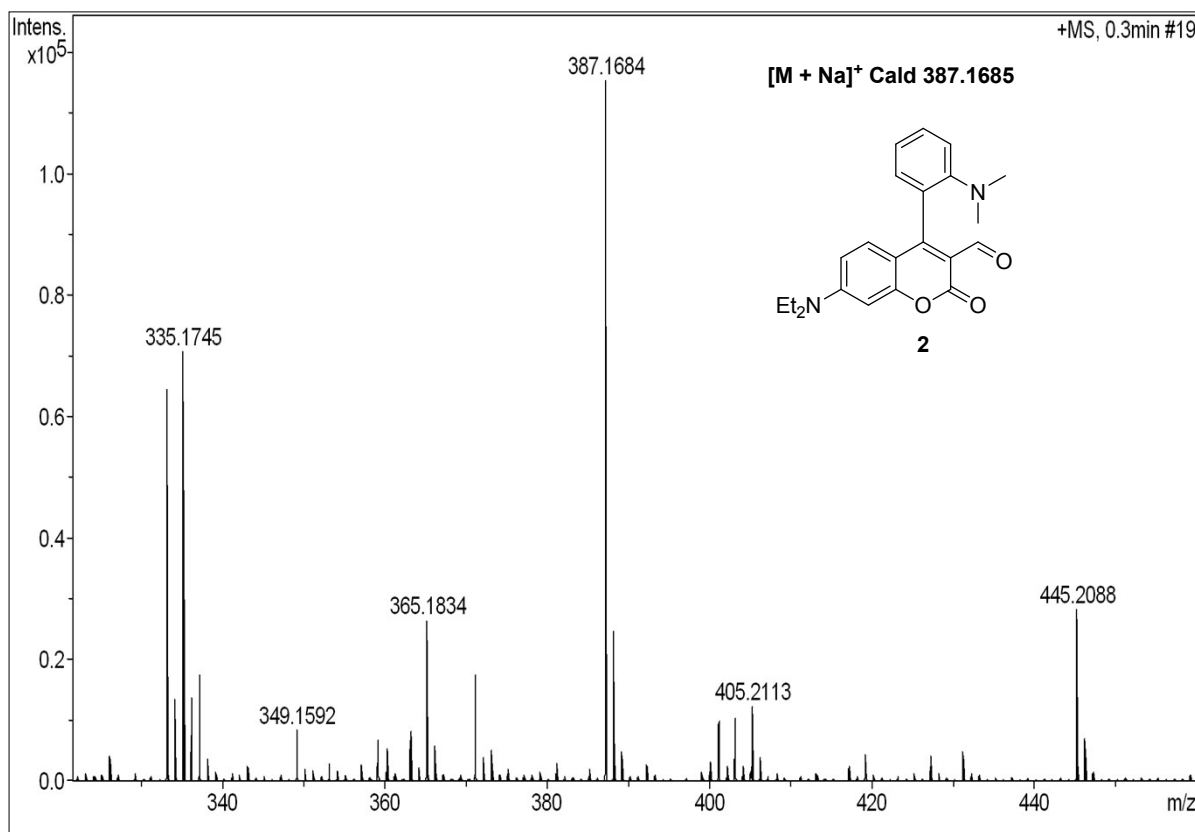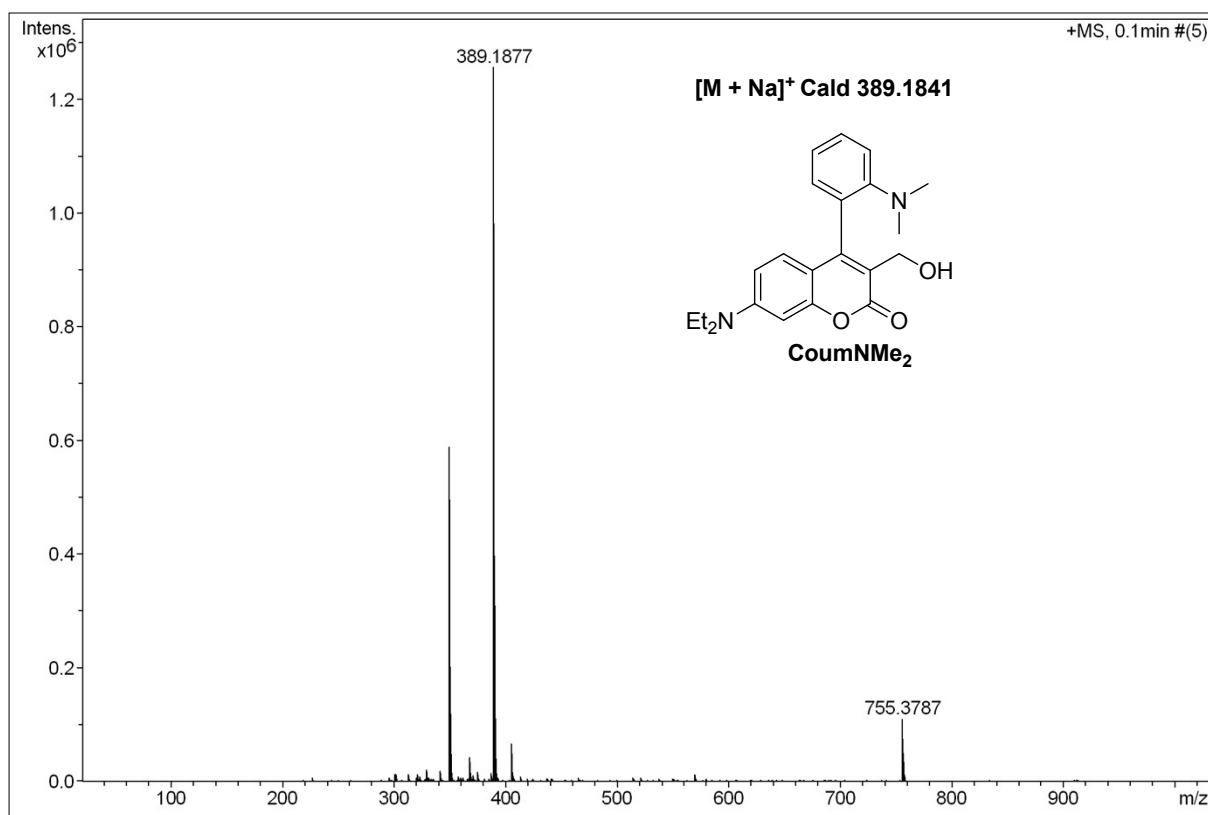

**Fig. S9.** (top) HR-MS (ESI) spectrum of compound **2** and (bottom) **CoumNMe<sub>2</sub>**.

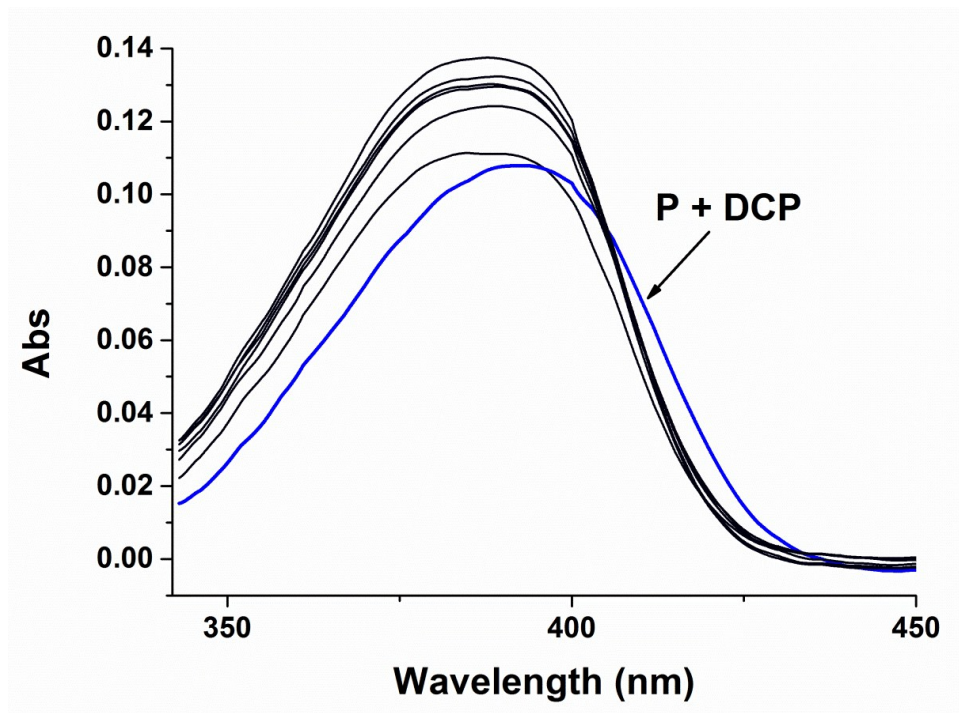

**Fig. S10.** Absorbance spectra of **CoumNMe<sub>2</sub>** (10  $\mu$ M) with 0.5 mM of DCP (blue) and other analytes (DCEP, DEMP, TEPP, TFA and HCl) in  $\text{CHCl}_3$ , incubated for 5.0 min at room temperature.

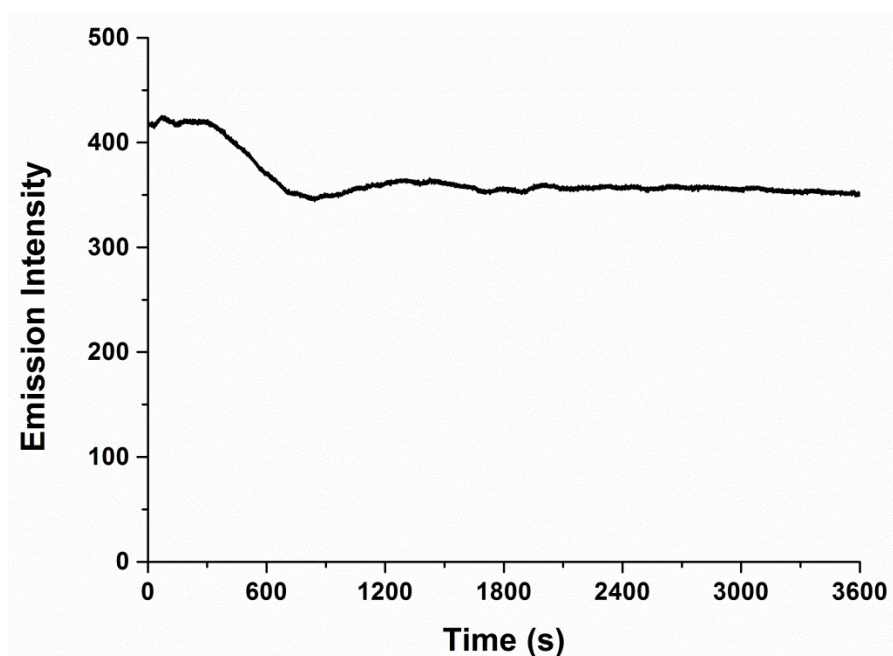

**Fig. S11.** Time-dependent emission spectral changes of **CoumNMe<sub>2</sub>** (10  $\mu$ M) with 0.5 mM DCP in  $\text{CHCl}_3$ ,  $\lambda_{\text{ex}} = 388$  nm,  $\lambda_{\text{em}} = 460$  nm.

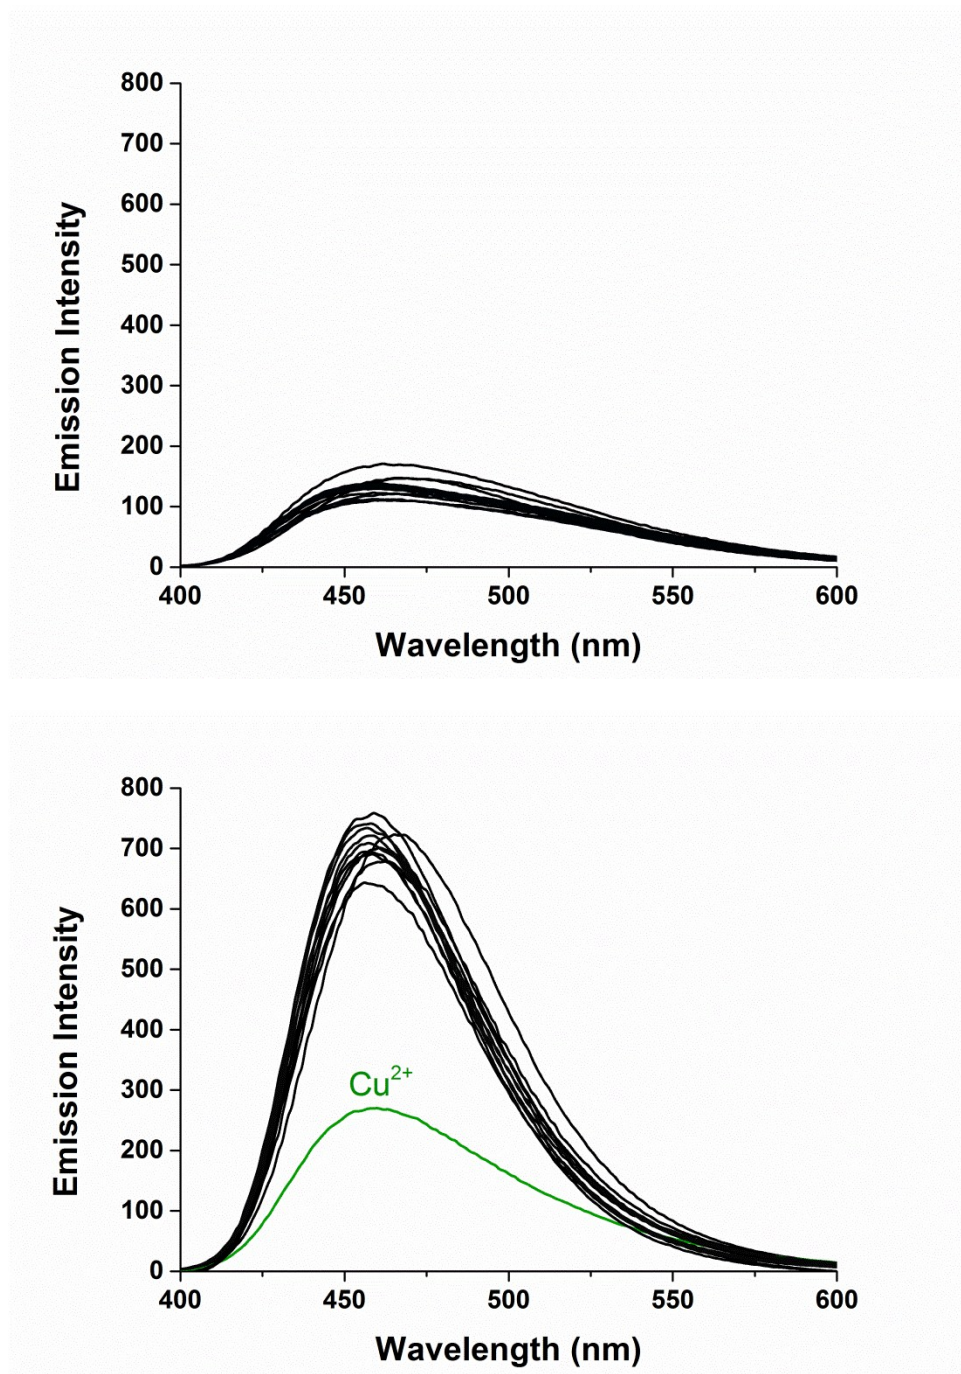

**Fig. S12.** (top) Emission spectra of **CoumNMe<sub>2</sub>** (10  $\mu$ M) with excess amount of metal ions (*vide infra*) in  $\text{CHCl}_3$ ; (bottom) Emission spectra of **CoumNMe<sub>2</sub>** (10  $\mu$ M) with excess amount of metal ions ( $\text{Li}^+$ ,  $\text{Na}^+$ ,  $\text{K}^+$ ,  $\text{Cd}^{2+}$ ,  $\text{Ce}^+$ ,  $\text{Co}^{2+}$ ,  $\text{Cu}^{2+}$ ,  $\text{Fe}^{3+}$ ,  $\text{Fe}^{2+}$ ,  $\text{Hg}^{2+}$ ,  $\text{Mg}^{2+}$ ,  $\text{Mn}^{2+}$ ,  $\text{Pb}^{2+}$ ,  $\text{Zn}^{2+}$ ) followed by addition of DCP (0.5 mM), in  $\text{CHCl}_3$ ,  $\lambda_{\text{ex}} = 388$  nm,  $\lambda_{\text{em}} = 460$  nm, slit width 3.0 nm/3.0 nm; (herein respective metal perchlorate salts were used as sources of the metal ion).

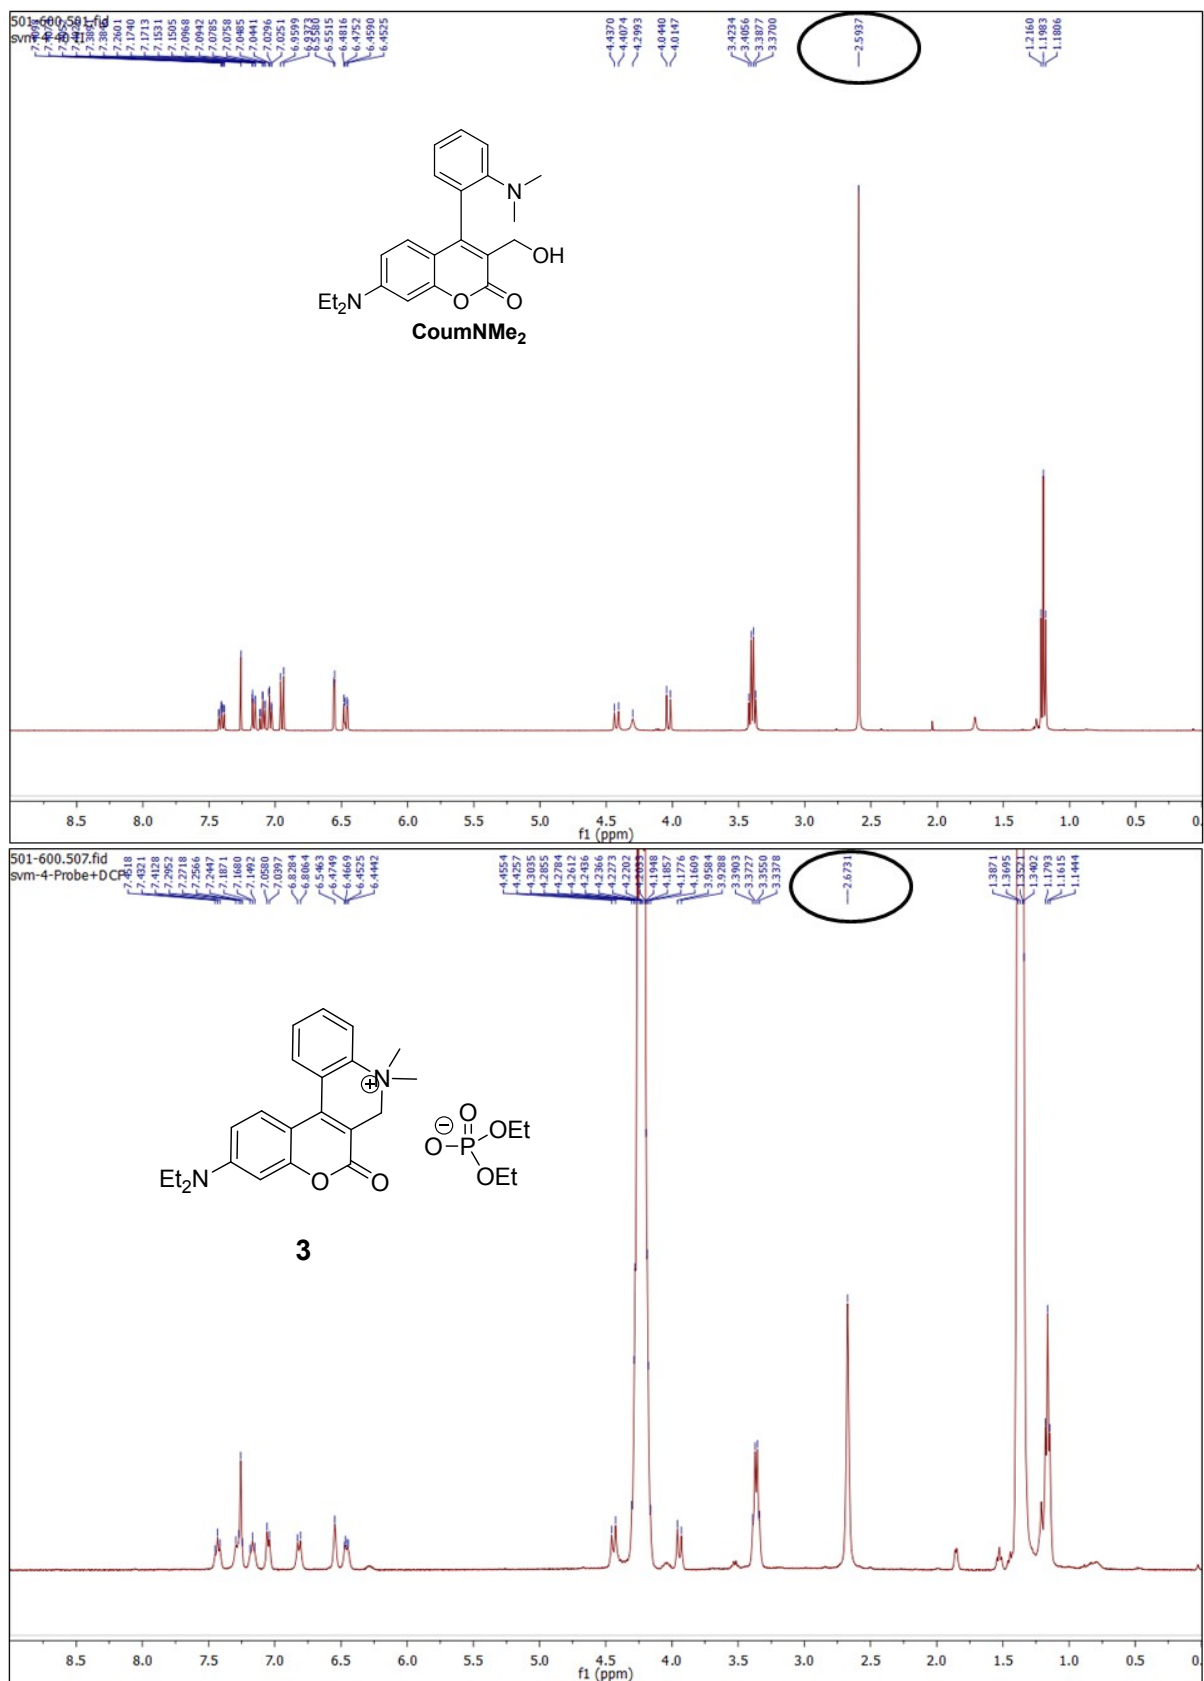

**Fig. S13.** (top) <sup>1</sup>H NMR spectra of CoumNMe<sub>2</sub>, and (bottom) CoumNMe<sub>2</sub> with DCP in CDCl<sub>3</sub> at room temperature.

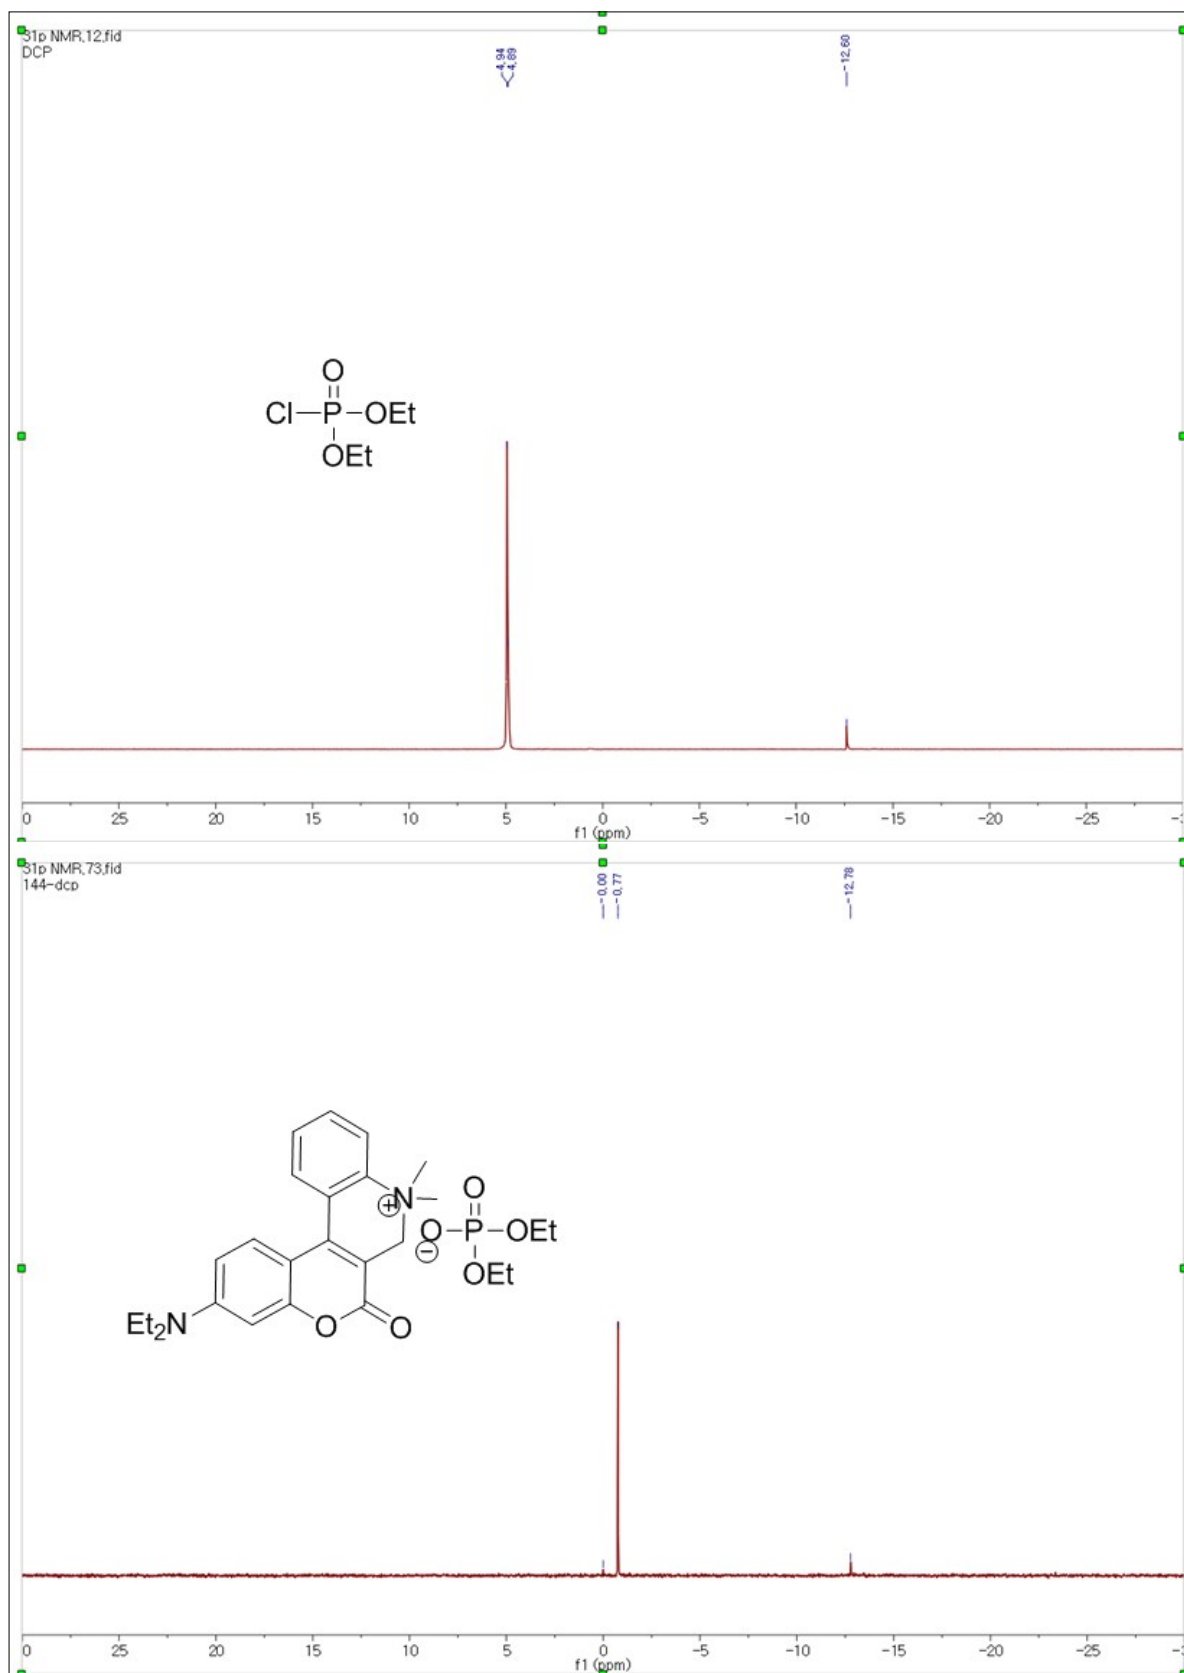

**Fig. S14.** (top) <sup>31</sup>P NMR spectra of DCP, and (bottom) **CoumNMe<sub>2</sub>** with DCP in CDCl<sub>3</sub> at room temperature.

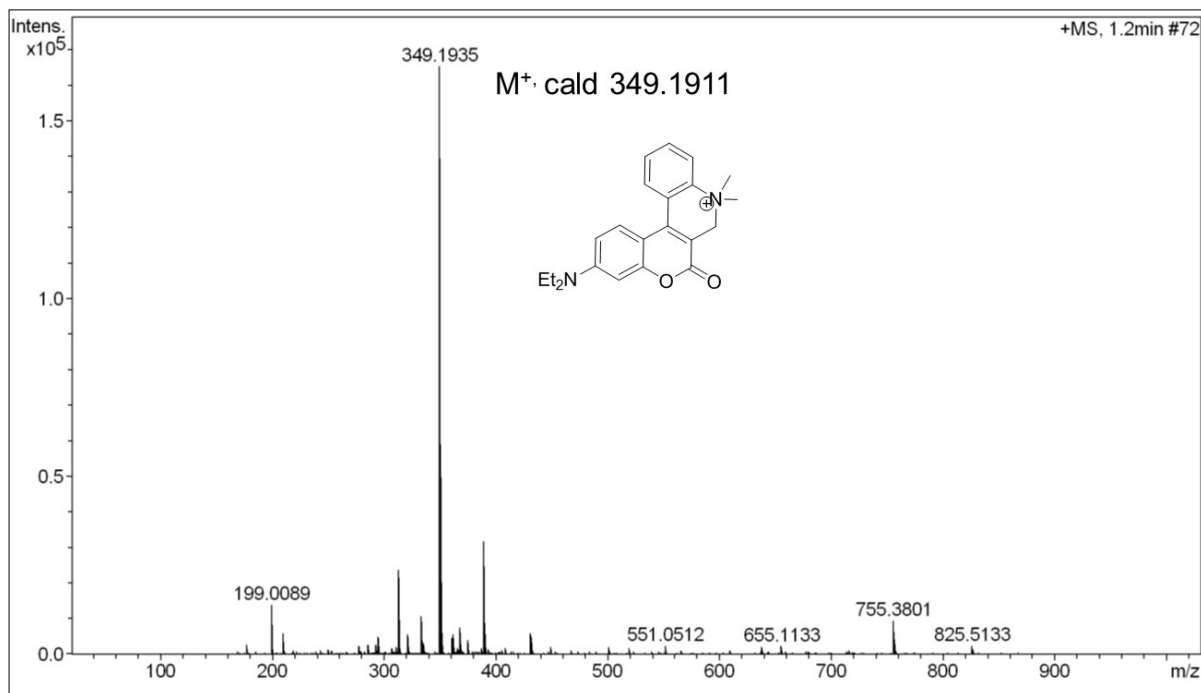

**Fig. S15.** HR-MS spectrum (ESI) of compound **3**.

**Table S1.** Absorption energies with largest oscillator strength for **CoumNMe<sub>2</sub>** and **3** (B3LYP/6-31g\* basis set, G09).

|                            | <i>f</i> | Composition   | CI (%) |
|----------------------------|----------|---------------|--------|
| <b>CoumNMe<sub>2</sub></b> | 0.2927   | HOMO-1 → LUMO | 48.5   |
|                            |          | HOMO → LUMO   | 48.7   |
| <b>3</b>                   | 0.2422   | HOMO → LUMO   | 98.3   |



|        | CoumNMe <sub>2</sub>                                                                | 3                                                                                    |
|--------|-------------------------------------------------------------------------------------|--------------------------------------------------------------------------------------|
| LUMO+2 | 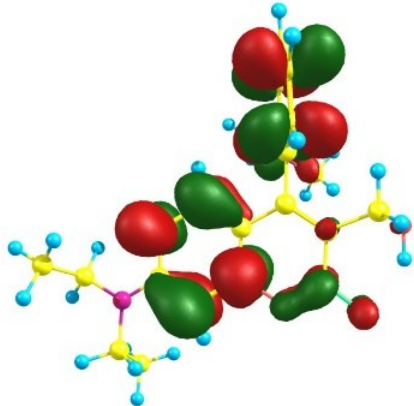   |    |
| LUMO+1 |   |   |
| LUMO   |  |  |
| HOMO   |  |  |



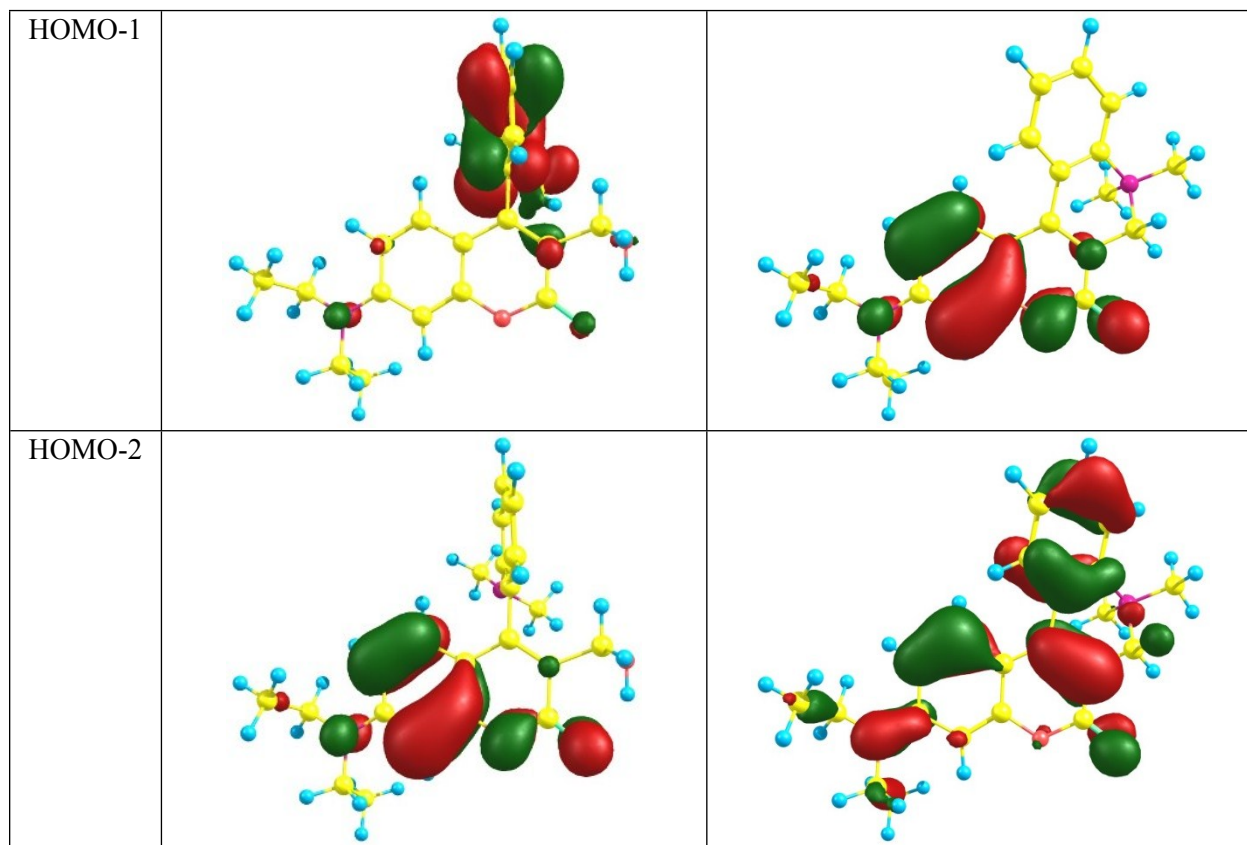

**Fig. S16.** DFT calculations of **CoumNMe<sub>2</sub>** and **compound 3**.

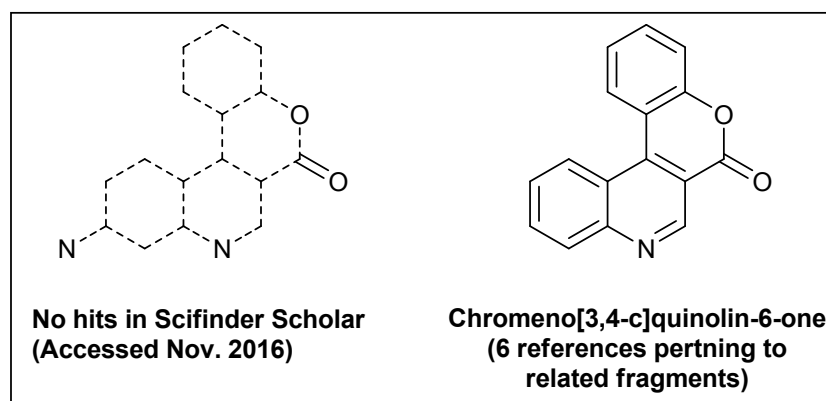

**Fig. S17.** Previously published research related to the skeleton of the chrominoquinoline core.

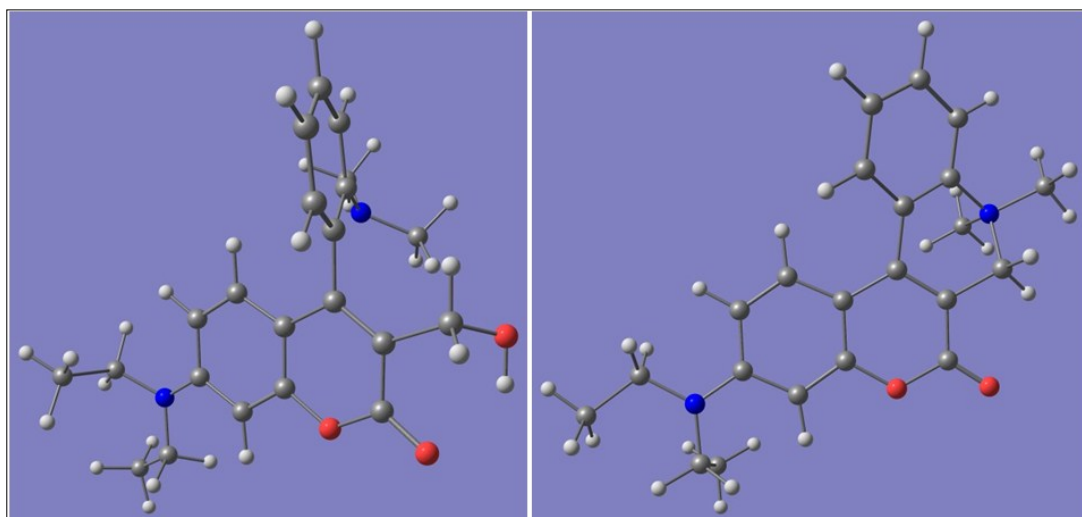

**Fig. S18.** DFT-optimized geometries of (*left*) **CoumNMe<sub>2</sub>**, and (*right*) **compound 3** (B3LYP/6-31g\* basis set, G09).

Information of the **CoumNMe<sub>2</sub>** and **3** calculated through ‘molinspiration property engine v2011.04’ at the website, <http://www.molinspiration.com>.

| <b>Properties (CoumNMe<sub>2</sub>)</b><br><b>(NOTE: abbreviation same as website)</b> | <b>Value</b> |
|----------------------------------------------------------------------------------------|--------------|
| milogP                                                                                 | 3.89         |
| TPSA                                                                                   | 56.91        |
| Natom                                                                                  | 27           |
| MW                                                                                     | 364.46       |
| nON                                                                                    | 5            |
| nOHNH                                                                                  | 1            |
| nviolations                                                                            | 0            |
| nrotb                                                                                  | 6            |
| volume                                                                                 | 358.23       |

| <b>Properties (3)</b><br><b>(NOTE: abbreviation same as website)</b> | <b>Value</b> |
|----------------------------------------------------------------------|--------------|
| milogP                                                               | -0.20        |
| TPSA                                                                 | 29.54        |
| Natom                                                                | 26           |
| MW                                                                   | 351.47       |
| nON                                                                  | 4            |
| nOHNH                                                                | 0            |
| nviolations                                                          | 0            |
| nrotb                                                                | 3            |
| volume                                                               | 341.4        |

--END--
